# Supplementary material for: Multiplex genomic profiling of non–small cell lung cancers from the LETS phase III trial of first-line S-1/carboplatin versus paclitaxel/carboplatin: results of a West Japan Oncology Group study
Source: PubMed Central journal article supplement (PMC4039163; doi:10.18632/oncotarget.1906), 2014-04-17
Supplement: oncotarget-05-2293-s001.pdf [file oncotarget-05-2293-s001.pdf]

**Multiplex genomic profiling of non–small cell lung cancers from the LETS phase III trial of first-line S-1/carboplatin versus paclitaxel/carboplatin: results of a west Japan oncology group study**

**Supplementary Information**

**Supplementary Table S1: LungCarta Panel**

| Gene          | Mutation detection                                                                                                                                                                                                                                                                                                                                                                                                                                                                                                                                                                                                                                                                            |
|---------------|-----------------------------------------------------------------------------------------------------------------------------------------------------------------------------------------------------------------------------------------------------------------------------------------------------------------------------------------------------------------------------------------------------------------------------------------------------------------------------------------------------------------------------------------------------------------------------------------------------------------------------------------------------------------------------------------------|
| <i>AKT1</i>   | E17K                                                                                                                                                                                                                                                                                                                                                                                                                                                                                                                                                                                                                                                                                          |
| <i>ALK</i>    | C1156Y, L1196M                                                                                                                                                                                                                                                                                                                                                                                                                                                                                                                                                                                                                                                                                |
| <i>BRAF</i>   | D594G/V, G469S/E/A/V, L597Q/V, V600E/K/M                                                                                                                                                                                                                                                                                                                                                                                                                                                                                                                                                                                                                                                      |
| <i>DDR2</i>   | C580Y, D125Y, G253C, G505S, G774E/V, I120M, I638F, L239R, L63V, T765P                                                                                                                                                                                                                                                                                                                                                                                                                                                                                                                                                                                                                         |
| <i>EGFR</i>   | R108K, T263P, A289V, G598V, E709K/H, E709A/G/V, G719S/C/A/D/R/V, M766_A767insAI, D761Y/N, S768I, R776C/H, V769_D770insASV, V769_D770insCV, D770_N771>AGG/N771>GF, N771T, D770_N771insG, N771_P772>SVDNR, P772_H773insV, H773N, H773_V774insNPH/PH/H, V774L, V774_C775insHV, T790M, L858R/M, L861Q/R, E746_A750del, E746_T751del, E746_S752>V, E746_T751>A, E746_T751>V, E746_S752>A, E746_S752>D, L747_E749del, L747_A750del, L747_T751del, L747_P753>S, L747S, L747_S752del, A750P, T751A/P/I, S752F, S752_I759del, P753S/Q, E746_S752>I, E746_T751>A, L747_A750>P, L747_T751>P, L747_P753>Q, T854A, E746_T751>S, D770_N771insG, V769_D770insASV, D770_N771insGL, D770fs*61, D770_N771insAPW |
| <i>EPHA3</i>  | A435S, D446Y, S449F, D806N, G187R, G518L, K761N, G766E, M269I, N379K, N85S, S229Y, T166N, T37K, T393K, W250R                                                                                                                                                                                                                                                                                                                                                                                                                                                                                                                                                                                  |
| <i>EPHA5</i>  | D493Y, G582E, M1034I, N1032S, R1007Q, S566Y, S810I, T856I                                                                                                                                                                                                                                                                                                                                                                                                                                                                                                                                                                                                                                     |
| <i>ERBB2</i>  | M774_A775insAYVM, A775_G776insAYVM                                                                                                                                                                                                                                                                                                                                                                                                                                                                                                                                                                                                                                                            |
| <i>FGFR4</i>  | P672T, H192fs*19                                                                                                                                                                                                                                                                                                                                                                                                                                                                                                                                                                                                                                                                              |
| <i>JAK2</i>   | L609S, P503L, R1122P, Y931C                                                                                                                                                                                                                                                                                                                                                                                                                                                                                                                                                                                                                                                                   |
| <i>KRAS</i>   | G12S/V/F/R/A/C/D, G13C/S/A/V/D, Q61L/R/P/H/E/K                                                                                                                                                                                                                                                                                                                                                                                                                                                                                                                                                                                                                                                |
| <i>MAP2K1</i> | D67N, K57N, Q56P                                                                                                                                                                                                                                                                                                                                                                                                                                                                                                                                                                                                                                                                              |
| <i>STK11</i>  | A347fs*13, A43_L50del6, D327fs*10, E120*, E165*, E223*, E70*, E70fs*26, F354L, G163C, G188fs*99, G196V, G56fs*4, G56W, G91L, H174R, I26fs*25, K191*, K78E, L285Q, L50_D53del4, M51fs*14, P179L, Q123R, Q137*, Q159*, Q170*, Q220*, Q37L, R426W, R86G, V197fs*69, V236fs*30, Y272Y                                                                                                                                                                                                                                                                                                                                                                                                             |

|               |                                                                                                                       |
|---------------|-----------------------------------------------------------------------------------------------------------------------|
| <i>MET</i>    | N375S, 982_1028del47                                                                                                  |
| <i>NOTCH1</i> | H2276fs*79, D1643H, R2328W, T1997M, V1672I, V2444fs*35                                                                |
| <i>NRAS</i>   | Q61E/K/H/L/R/P                                                                                                        |
| <i>NRF2</i>   | D29H, D77N/A, E79Q/K/G, G31A, G81D, R34Q                                                                              |
| <i>NTRK1</i>  | Q80*, R119H, S326R                                                                                                    |
| <i>NTRK2</i>  | Q666R, C45F, G261R, L138F, L670M, L755L                                                                               |
| <i>NTRK3</i>  | I769N, L152I, L248M, L270M, L336Q, S184C, T283K, V307L, R721G                                                         |
| <i>PIK3CA</i> | E542Q/K, E545Q/K, H1047Y/R/L                                                                                          |
| <i>PTCH1</i>  | R1308G, R682L, S1326fs*46                                                                                             |
| <i>PTEN</i>   | R233*                                                                                                                 |
| <i>PTPN11</i> | E76V                                                                                                                  |
| <i>PTPRD</i>  | D1162N, D154Y, I44I, L1036Q, P1809R, R1536L, R584S, S1703R, T337A, V483E                                              |
| <i>TP53</i>   | G245C/S, G245D/V, R158C/G/L/P, R175L/H, R248G/L/Q/W, R249S/W/M,<br>R273C/H/L/P, R282G/W, V157F, Y163C, R175L/H, Y220C |

**Supplementary Table S2:** Type of EGFR Mutation in 46 EGFR mutation positive patients

| exon   | Type of mutation    | Number of patients (n = 46) |
|--------|---------------------|-----------------------------|
| exon18 | G719A               | 2                           |
|        | E709A/G719S*        | 1                           |
| exon19 | T751I               | 1                           |
|        | T751A               | 1                           |
|        | E746_A750del        | 8                           |
|        | E746_T751del, V ins | 2                           |
|        | L747_T751del        | 2                           |
|        | L747_T750del, P ins | 1                           |
|        | L747_S752del, P753S | 2                           |
| exon20 | V769_D770insASV     | 1                           |
|        | H773_V774insPH      | 1                           |
| exon21 | L858R               | 22                          |
|        | L861Q               | 2                           |

\*Double EGFR mutation was detected in one patients.

**Supplementary Table S3:** LungFusion Panel

| <i>ALK</i> fusion genes | <i>RET</i> fusion genes | <i>ROS1</i> fusion genes |
|-------------------------|-------------------------|--------------------------|
| KIF5B-ALK-K17-A20       | KIF5B-RETv2-K16-R12     | CD74-ROS1-C6-R32         |
| EML4-ALK v1             | KIF5B-RETv4-K15-R12     | CD74-ROS1-C6-R34         |
| EML4-ALK v2             | KIF5B-RETv4-K22-R12     | SLC34A2-ROS1             |
| EML4-ALK v3a            | KIF5B-RETv4-K24-R11     | SLC34A2-ROS-long         |
|                         | CCDC6-RET-C1-R12        | SLC34A2-ROS-short        |
|                         |                         | LRIG3v1-ROS1             |
|                         |                         | SDC4-ROS1-S2-R32         |
|                         |                         | SDC4-ROS1-S4-R32         |
|                         |                         | SDC4-ROS1-S4-R34         |
|                         |                         | EZR-ROS1-E10-R34         |
|                         |                         | TPM3-ROS1                |

**Supplementary Table S4:** Junction sequences of fusion cDNAs

| Fusion gene         | Junction sequence (5'-3')                                                                       |
|---------------------|-------------------------------------------------------------------------------------------------|
| KIF5B-ALK-K17-A20   | CCCTCAGTGAAGAACTAGTCCAGCTTCGAGCACAAG TGTACCGCCGGAAGCACCAGGAGCTGCAAGCCATGCAGAT                   |
| EML4-ALK v1         | TACTGTAGAGCCCACACCTGGGAAAGGACCTAAAG TGTACCGCCGGAAGCACCAGGAGCTGCAAGCCATGCAGAT                    |
| EML4-ALK v2         | TCTAACTCGGGAGACTATGAAATATTGTA TGTACCGCCGGAAGCACCAGGAGCTGCAAGCCATGCAGAT                          |
| EML4-ALK v3a        | TACCAAACTGCAGACAAGCATAAAGATGTCATCATCAACCAAG TGTACCGCCGGAAGCACCAGGAGCTGCAAGCCATGCAG              |
| KIF5B-RETv2-K16-R12 | AGGAGTTAGCAGCATGTCAGCTTCGTATCTCTCAA GAGGATCCAAAGTGGGAATTCCTCGGAAGAACTTGGTTCTTGG                 |
| KIF5B-RETv4-K15-R12 | CAGAAATAGGAATTGCTGTGGGAAATAATGATGTAAAG GAGGATCCAAAGTGGGAATTCCTCGGAAGAACTTGGTTCTTGGAAAACTCTAGC   |
| KIF5B-RETv4-K22-R12 | TTTGTTTCAGGACCTGGCTACAAGAGTAAAAAG GAGGATCCAAAGTGGGAATTCCTCGGAAGAACTTGGTTCTTGG                   |
| KIF5B-RETv4-K24-R11 | AGAATATGGCCAGAAGAGGGCATTCTGCACAGATTG ATCCACTGTGCGACGAGCTGTGCCGCACGGTGATCGCAGCCGCTGTCCTCTTCTCCTT |
| CCDC6-RET-C1-R12    | AAGGCACTGCAGGAGGAGAACCGCGACCTGCGCAAAGCCAGCGTGACCATC GAGGATCCAAAGTGGGAATTCCTCGGAAGAACTTGGTTCT    |
| CD74-ROS1-C6-R32    | TTGAAATGAGCAGGCACTCCTTGGAGCAAAGCCCACTGACGCTCCACCGAAAG CTGGAGTCCCAAATAAACCAGGC                   |
| CD74-ROS1-C6-R34    | AAATGAGCAGGCACTCCTTGGAGCAAAGCCCACTGACGCTCCACCGAAAG ATGATTTTTGGATACCAGAAACAAGTTTC                |
| SLC34A2-ROS1        | CTCCTGAGACCTTTGATAACATAACCATTAGCAGAGAGGCTCAGG CTGGAGTCCCAAATAAACCAGGCATTCCCAAATTAC              |
| SLC34A2-ROS-long    | ACTTTTTTCGTGTGCTCCCTGGATATTCTTAGTAGCGCCTTCCAGCTGGTTGG AGCTGGAGTCCCAAATAAACCAGGCATTCCCAAATTAC    |
| SLC34A2-ROS-short   | ACTTTTTTCGTGTGCTCCCTGGATATTCTTAGTAGCGCCTTCCAGCTG GTTGGAGATGATTTTTTGGATACCAGAAACAAGTTTC          |
| LRIG3v1-ROS1        | CTTCAGGTGCTGGATTTTTCTTACCACAACATGACAGTAGTG TCTGGCATAGAAGATTAAGAATCAAAAAAGTGCCAAGGAAGG           |
| SDC4-ROS1-S2-R32    | GGAATCTGATGACTTTGAGCTGTCTGGCTCTGGAGATCTGG CTGGAGTCCCAAATAAACCAGGCATTCCCAAATTAC                  |
| SDC4-ROS1-S4-R32    | AGGGCAGCAACATCTTTGAGAGAACGGAGGTCCTGGCAG CTGGAGTCCCAAATAAACCAGGCATTCCCAAATTAC                    |
| SDC4-ROS1-S4-R34    | AGGGCAGCAACATCTTTGAGAGAACGGAGGTCCTGGCAG ATGATTTTTGGATACCAGAAACAAGTTTCATAC                       |
| EZR-ROS1-E10-R34    | GAAGGCAGAGAGAG ATGATTTTTGGATACCAGAAACAAGTTTCATACTTACTATTATAGTTGGAATATTTCTGGTTGTTACAATCCCCT      |
| TPM3-ROS1           | GTAGCCAAGCTGGAAAAGACAATTGATGACCTGGAAG TCTGGCATAGAAGATTAAGAATCAAAAAAGTGCCAAGGAAGGGGTGACAGTGCT    |

**Supplementary Table S5:** PCR (F, forward; R, reverse) and extension (EXT) primers for the LungFusion Panel

| Fusion gene         | Primer | Sequence                                | EXT mass | EXT call | Plex |
|---------------------|--------|-----------------------------------------|----------|----------|------|
| KIF5B-ALK-K17-A20   | F      | 5'- ACGTTGGATGATCTGCATGGCTTGCAGCTC -3'  |          |          |      |
|                     | R      | 5'- ACGTTGGATGCCCTCAGTGAAGAAGTAGTC -3'  |          |          |      |
|                     | EXT    | 5'- CGGTACACTTGTGCTCG -3'               | 5448.6   | T        | 1    |
| EML4-ALK v1         | F      | 5'- ACGTTGGATGATCTGCATGGCTTGCAGCTC -3'  |          |          |      |
|                     | R      | 5'- ACGTTGGATGTACTGTAGAGCCCACACCTG -3'  |          |          |      |
|                     | EXT    | 5'- CGGCGGTACACTTTAGG -3'               | 5553.5   | A        | 9    |
| EML4-ALK v2         | F      | 5'- ACGTTGGATGATCTGCATGGCTTGCAGCTC -3'  |          |          |      |
|                     | R      | 5'- ACGTTGGATGATGTCTAACTCGGGAGACTA -3'  |          |          |      |
|                     | EXT    | 5'- CGGCGGTACAAGTACAA -3'               | 5555.5   | A        | 10   |
| EML4-ALK v3a        | F      | 5'- ACGTTGGATGTACCAAACTGCAGACAAGC -3'   |          |          |      |
|                     | R      | 5'- ACGTTGGATGATCTGCATGGCTTGCAGCTC -3'  |          |          |      |
|                     | EXT    | 5'- GCGGTACACTTGGTTGA -3'               | 5568.5   | A        | 8    |
| KIF5B-RETv2-K16-R12 | F      | 5'- ACGTTGGATGAGGAGTTAGCAGCATGTCAG -3'  |          |          |      |
|                     | R      | 5'- ACGTTGGATGCCAAGAACCAAGTTCTTCCG -3'  |          |          |      |
|                     | EXT    | 5'- TATCTCTCAAGAGGATCCAAA -3'           | 6685.4   | G        | 7    |
| KIF5B-RETv4-K15-R12 | F      | 5'- ACGTTGGATGTCTCCTAGAGTTTTTCCAAG -3'  |          |          |      |
|                     | R      | 5'- ACGTTGGATGCAGAAATAGGAATTGCTGTGG -3' |          |          |      |
|                     | EXT    | 5'- TTTGGATCCTCCTTTACATCAT -3'          | 6953.4   | A        | 5    |
| KIF5B-RETv4-K22-R12 | F      | 5'- ACGTTGGATGTTTGTTCAGGACCTGGCTAC -3'  |          |          |      |

|                     |     |                                         |        |   |   |
|---------------------|-----|-----------------------------------------|--------|---|---|
|                     | R   | 5'- ACGTTGGATGCCAAGAACCAAGTTCTTCCG -3'  |        |   |   |
|                     | EXT | 5'- AGAGTTAAAAAGGAGGATCCAAA -3'         | 7449.9 | G | 1 |
| KIF5B-RETv4-K24-R11 | F   | 5'- ACGTTGGATGATGAAGGAGAAGAGGACAGC -3'  |        |   |   |
|                     | R   | 5'- ACGTTGGATGAGAATATGGCCAGAAGAGGG -3'  |        |   |   |
|                     | EXT | 5'- GTCGCACAGTGGATCAATC -3'             | 6139.9 | A | 4 |
| CCDC6-RET-C1-R12    | F   | 5'- ACGTTGGATGAAGGCACTGCAGGAGGAGAA -3'  |        |   |   |
|                     | R   | 5'- ACGTTGGATGAGAACCAAGTTCTTCCGAGG -3'  |        |   |   |
|                     | EXT | 5'- AGCGTGACCATCGAGGATCCA -3'           | 6711.4 | A | 2 |
| CD74-ROS1-C6-R32    | F   | 5'- ACGTTGGATGGCCTGGTTTATTTGGGACTC -3'  |        |   |   |
|                     | R   | 5'- ACGTTGGATGTTGAAATGAGCAGGCACTCC -3'  |        |   |   |
|                     | EXT | 5'- TGGGACTCCAGCTTTCG -3'               | 5464.6 | C | 6 |
| CD74-ROS1-C6-R34    | F   | 5'- ACGTTGGATGGAAACTTGTTTCTGGTATCC -3'  |        |   |   |
|                     | R   | 5'- ACGTTGGATGAAATGAGCAGGCACTCCTTG -3'  |        |   |   |
|                     | EXT | 5'- CGCTCCACCGAAAGATG -3'               | 5435.6 | A | 4 |
| SLC34A2-ROS1        | F   | 5'- ACGTTGGATGGTAATTTGGGAATGCCTGGT -3'  |        |   |   |
|                     | R   | 5'- ACGTTGGATGCTCCTGAGACCTTTGATAAC -3'  |        |   |   |
|                     | EXT | 5'- GGACTCCAGCCTGAGCC -3'               | 5483.5 | A | 3 |
| SLC34A2-ROS-long    | F   | 5'- ACGTTGGATGGTAATTTGGGAATGCCTGGT -3'  |        |   |   |
|                     | R   | 5'- ACGTTGGATGACTTTTTTCGTGTGCTCCCTG -3' |        |   |   |
|                     | EXT | 5'- GGGACTCCAGCTCCAACCA -3'             | 6030.0 | C | 2 |
| SLC34A2-ROS-short   | F   | 5'- ACGTTGGATGACTTTTTTCGTGTGCTCCCTG -3' |        |   |   |
|                     | R   | 5'- ACGTTGGATGGAAACTTGTTTCTGGTATCC -3'  |        |   |   |

|                  |     |                                        |        |   |   |
|------------------|-----|----------------------------------------|--------|---|---|
|                  | EXT | 5'- CTTCCAGCTGGTTGGAGAT -3'            | 6122.0 | G | 3 |
| LRIG3v1-ROS1     | F   | 5'- ACGTTGGATGCTTCAGGTGCTGGATTTTTC -3' |        |   |   |
|                  | R   | 5'- ACGTTGGATGCCTTCCTTGGCACTTTTTTG -3' |        |   |   |
|                  | EXT | 5'- GACAGTAGTGTCTGGCATAGA -3'          | 6781.5 | A | 1 |
| SDC4-ROS1-S2-R32 | F   | 5'- ACGTTGGATGGTAATTTGGGAATGCCTGGT -3' |        |   |   |
|                  | R   | 5'- ACGTTGGATGGGAATCTGATGACTTTGAGC -3' |        |   |   |
|                  | EXT | 5'- CTCCAGCCAGATCTCCA -3'              | 5362.5 | C | 7 |
| SDC4-ROS1-S4-R32 | F   | 5'- ACGTTGGATGAGGGCAGCAACATCTTTGAG -3' |        |   |   |
|                  | R   | 5'- ACGTTGGATGGTAATTTGGGAATGCCTGGT -3' |        |   |   |
|                  | EXT | 5'- AGGTCCTGGCAGCTGGAGT -3'            | 6132.0 | C | 5 |
| SDC4-ROS1-S4-R34 | F   | 5'- ACGTTGGATGAGGGCAGCAACATCTTTGAG -3' |        |   |   |
|                  | R   | 5'- ACGTTGGATGGTATGAACTTGTTTCTGG -3'   |        |   |   |
|                  | EXT | 5'- GGCCTGGCAGATGATTTT -3'             | 6176.9 | T | 1 |
| EZR-ROS1-E10-R34 | F   | 5'- ACGTTGGATGGAAGGCAGAGAGAGATGATT -3' |        |   |   |
|                  | R   | 5'- ACGTTGGATGAGTGGGATTGTAACAACCAG -3' |        |   |   |
|                  | EXT | 5'- TTTGGATACCAGAAACAAG -3'            | 6171.9 | T | 6 |
| TPM3-ROS1        | F   | 5'- ACGTTGGATGATAAGCACTGTCACCCCTTC -3' |        |   |   |
|                  | R   | 5'- ACGTTGGATGGTAGCCAAGCTGGAAAAGAC -3' |        |   |   |
|                  | EXT | 5'- TCTATGCCAGACTTCCA -3'              | 5392.5 | C | 2 |



**Supplementary Table S6:** Assay sensitivity for the LungFusion Panel

| Fusion gene         | Minimum number of copies detected |
|---------------------|-----------------------------------|
| KIF5B-ALK-K17-A20   | 10                                |
| EML4-ALK v1         | 10                                |
| EML4-ALK v2         | 5                                 |
| EML4-ALK v3a        | 5                                 |
| KIF5B-RETv2-K16-R12 | 5                                 |
| KIF5B-RETv4-K15-R12 | 30                                |
| KIF5B-RETv4-K22-R12 | 10                                |
| KIF5B-RETv4-K24-R11 | 5                                 |
| CCDC6-RET-C1-R12    | 20                                |
| CD74-ROS1-C6-R32    | 60                                |
| CD74-ROS1-C6-R34    | 5                                 |
| SLC34A2-ROS1        | 10                                |
| SLC34A2-ROS-long    | 5                                 |
| SLC34A2-ROS-short   | 60                                |
| LRIG3v1-ROS1        | 20                                |
| SDC4-ROS1-S2-R32    | 10                                |
| SDC4-ROS1-S4-R32    | 10                                |
| SDC4-ROS1-S4-R34    | 30                                |
| EZR-ROS1-E10-R34    | 60                                |
| TPM3-ROS1           | 10                                |

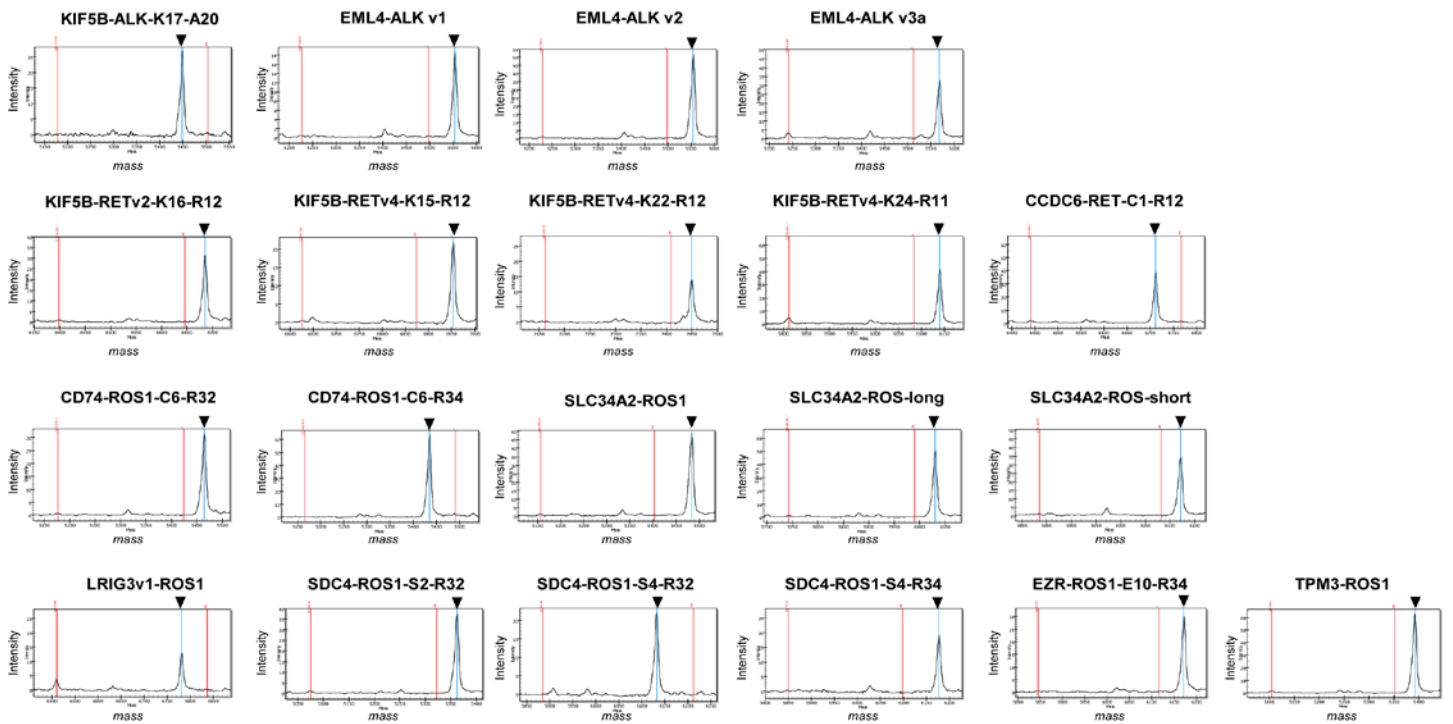

**Supplementary Figure S1:** Representative mass spectra for *ALK*, *RET*, and *ROS1* fusion variants. Arrowheads indicate mass spectrometry peaks corresponding to the indicated fusion genes.

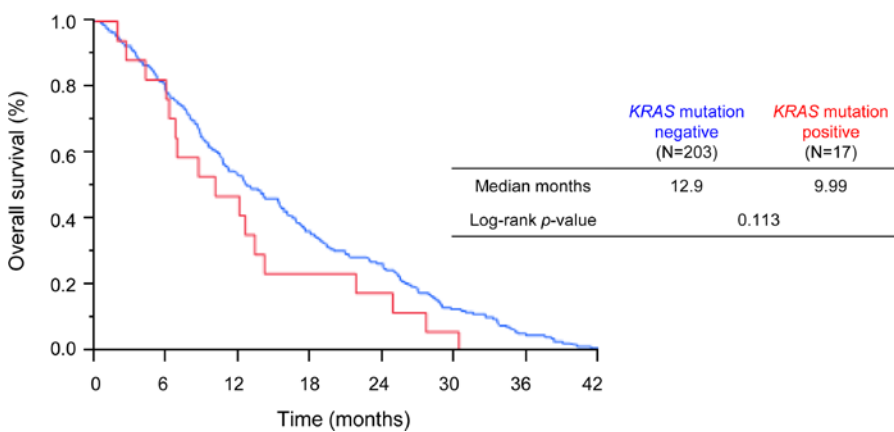

**Supplementary Figure S2:** OS analysis according to *KRAS* mutation status. *KRAS* mutation–positive patients ( $n = 17$ ) were compared with patients negative for *KRAS* and *EGFR* mutations as well as for *ALK*, *RET*, and *ROS1* fusion genes ( $n = 203$ ).
